# Supplementary material for: Hydrodeoxygenation of Levulinic Acid to γ-Valerolactone over Mesoporous Silica-Supported Cu-Ni Composite Catalysts
Source: MDPI journal article supplement (doi:10.3390/molecules27175383), 2022-08-24
Supplement: s1 [file s1]

# Hydrodeoxygenation of levulinic acid to $\gamma$ -valerolactone over mesoporous silica supported Cu-Ni composite catalysts

Margarita Popova<sup>1\*</sup>, Ivalina Trendafilova<sup>2,3</sup>, Manuela Oykova<sup>1</sup>, Yavor Mitrev<sup>1</sup>, Pavletta Shestakova<sup>1</sup>, Magdolna Mihályi<sup>4</sup>, Ágnes Szegedi<sup>4\*</sup>

<sup>1</sup> Institute of Organic Chemistry with Centre of Phytochemistry, Bulgarian Academy of Sciences, Acad. G. Bonchev Str., Bl. 9, 1113

<sup>2</sup> Laboratory of Inorganic Materials Chemistry, University of Namur, Namur, 5000, Belgium

<sup>3</sup> Namur Institute of Structured Matter, University of Namur, Namur, 5000, Belgium

<sup>4</sup> Research Centre for Natural Sciences, 1117 Budapest, Magyar tudósok körútja 2, Hungary

\*Corresponding authors: [Margarita.Popova@orgchm.bas.bg](mailto:Margarita.Popova@orgchm.bas.bg), [szegedi.agnes@ttk.hu](mailto:szegedi.agnes@ttk.hu)

## Supplementary data

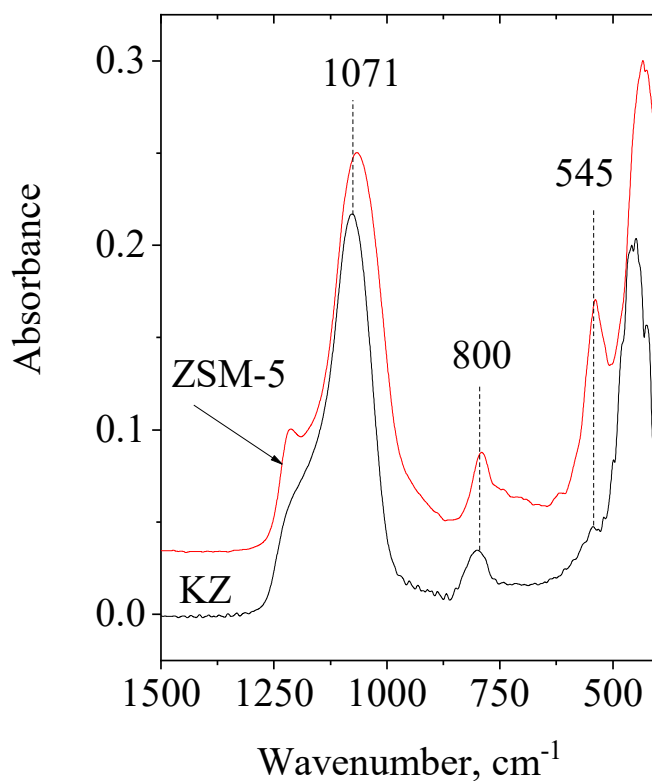

**Figure S1** ATR FT-IR spectra of KZ mesoporous silica/zeolite composite compared to well crystallized ZSM-5 zeolite

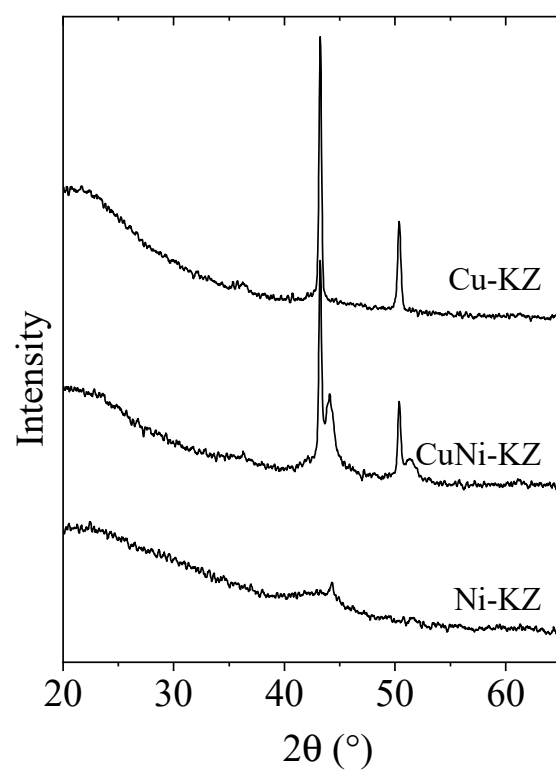

**Figure S2.** XRD patterns of the spent catalysts
